# Supplementary material for: Nano–bio interaction between human immunoglobulin G and nontoxic, near-infrared emitting water-borne silicon quantum dot micelles
Source: Royal Society of Chemistry journal article supplement (doi:10.1039/d3ra00552f), 2023-01-01
Supplement: d3ra00552f1.pdf [file d3ra00552f1.pdf]

## **Supporting Information**

# **Nano-bio interaction between human immunoglobulin G and nontoxic, near-infrared emitting water-borne silicon quantum dot micelles**

Shanmugavel Chinnathambi<sup>1,2 \*</sup>, Naoto Shirahata<sup>3,4, 5, \*</sup>, Mahima Kumar<sup>1</sup>,

Subramani Karthikeyan<sup>6</sup>, Katsuhiko Abe<sup>1</sup>, Vijayanthi Thangavel<sup>1</sup> and Ganesh N. Pandian<sup>1\*</sup>

<sup>1</sup>Institute for Integrated Cell-Material Sciences (WPI-iCeMS), Institute for Advanced Study, Kyoto University, Kyoto 606-8501, Japan

<sup>2</sup>International Center for Young Scientists, National Institute for Materials Science (NIMS), 1-2-1 Sengen, Tsukuba, Ibaraki 305-0047, Japan

<sup>3</sup>Graduate School of Chemical Sciences and Engineering, Hokkaido University, Sapporo 060-0814, Japan

<sup>4</sup>International Center for Materials Nanoarchitectonics (WPI-MANA), NIMS, Namiki, Tsukuba 305-0044, Japan

<sup>5</sup>Department of Physics, Chuo University, 1-13-27 Kasuga, Bunkyo, Tokyo 112-8551, Japan

<sup>6</sup>Centre for Healthcare Advancement, Innovation and Research, Vellore Institute of Technology, Chennai, 600 127, India

C.A. E-mail: CHINNATHAMBI.Shanmugavel.8s@kyoto-u.ac.jp; SHIRAHATA.Naoto@nims.go.jp;

NAMASIVAYAM.ganeshpandian.5z@kyoto-u.ac.jp

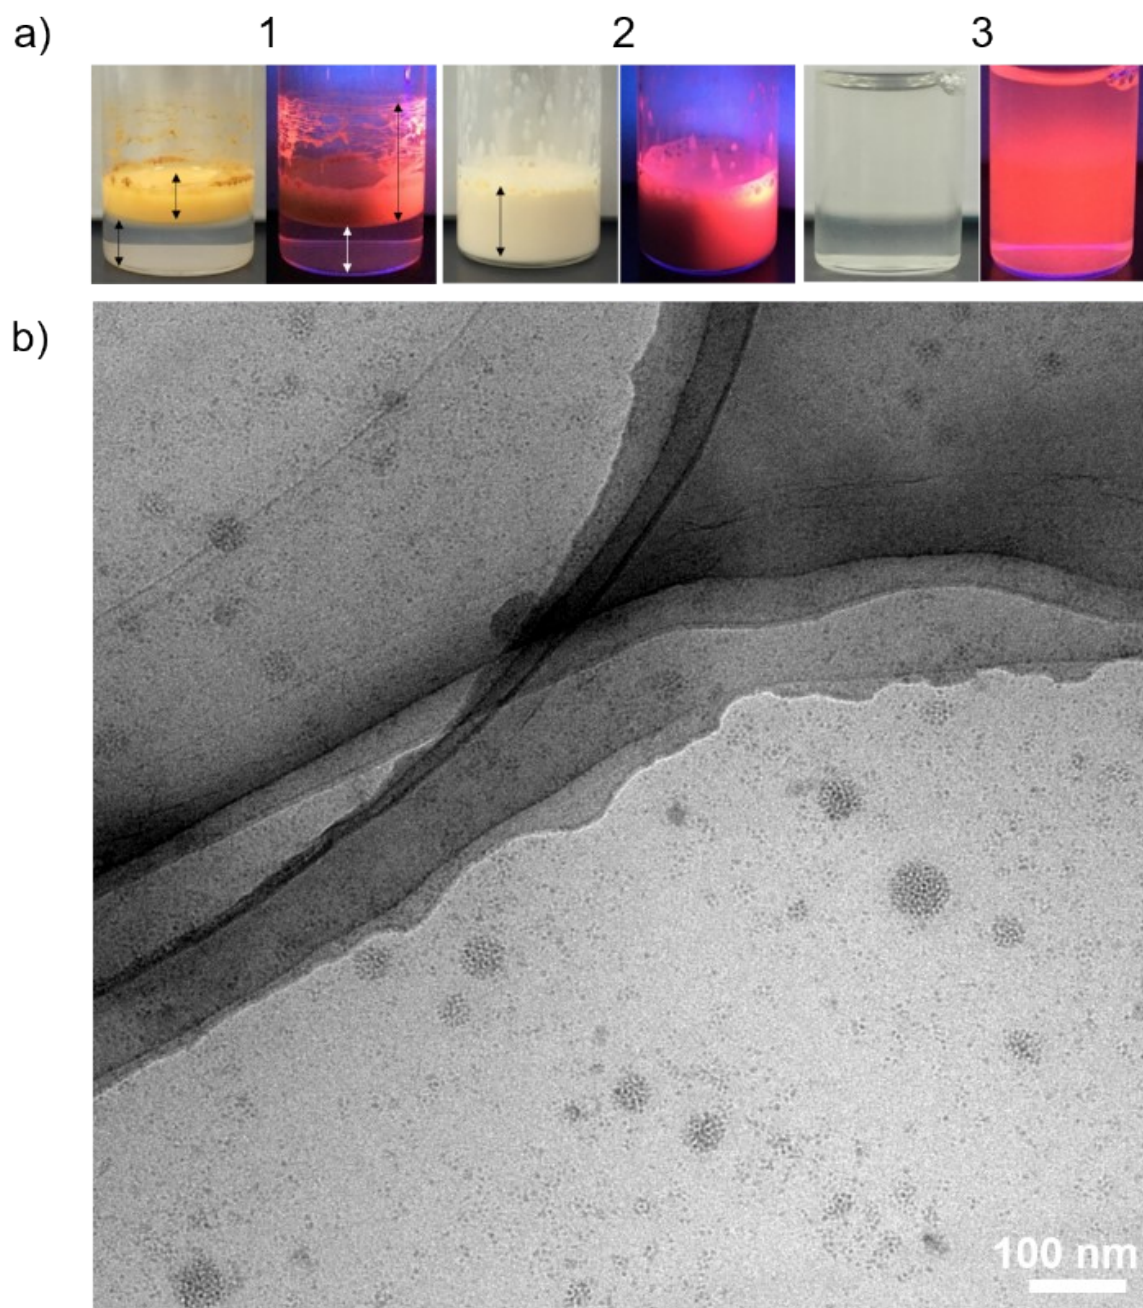

**Figure S1.** a). It is shown that SiQD-De/F127 nanoparticles can be prepared in three different ways. For each step, three sets of photos are shot using room lighting and UV light. Eight mL of Milli-Q water and 24 microliters of SiQD-De toluene were added to the glass bottle. Arrows on a left-pair image represent the amounts of toluene and water. b). An image of a SiQD-De/F127 nanoparticle TEM image. A Pluronic F127 molecule surrounds the constructed SiQDs-De cores, which range in diameter from 30 to 80 nm and are contrasted in the image.

**The left-pair** image was captured following toluene evaporation in the fume hood. A layer of SiQD-De (a yellow-colored band) has been left on top of the water, as is evident in the image on the left. SiQD-De is still present in small amounts inside the bottle's wall. The yellow-colored band in the right image of the pair's red-fluorescence confirms that it is made up of SiQD-De.

**The middle-pair** was obtained by shaking the glass bottle shown in the left-pair. The left image shows that the Si-De/F127 water solution is a milky color. The SiQD-De/F127 is well dispersed in the milky-colored solution, as seen in the right image.

The middle pair was diluted with Milli-Q water to produce the **right pair**. The left image shows a clear, colorless water solution. The successful encapsulation of SiQD-De with the Pluronic F127 molecule can be seen in the right image, which demonstrates that SiQD-De/F127 nanoparticles are highly dispersed in water.

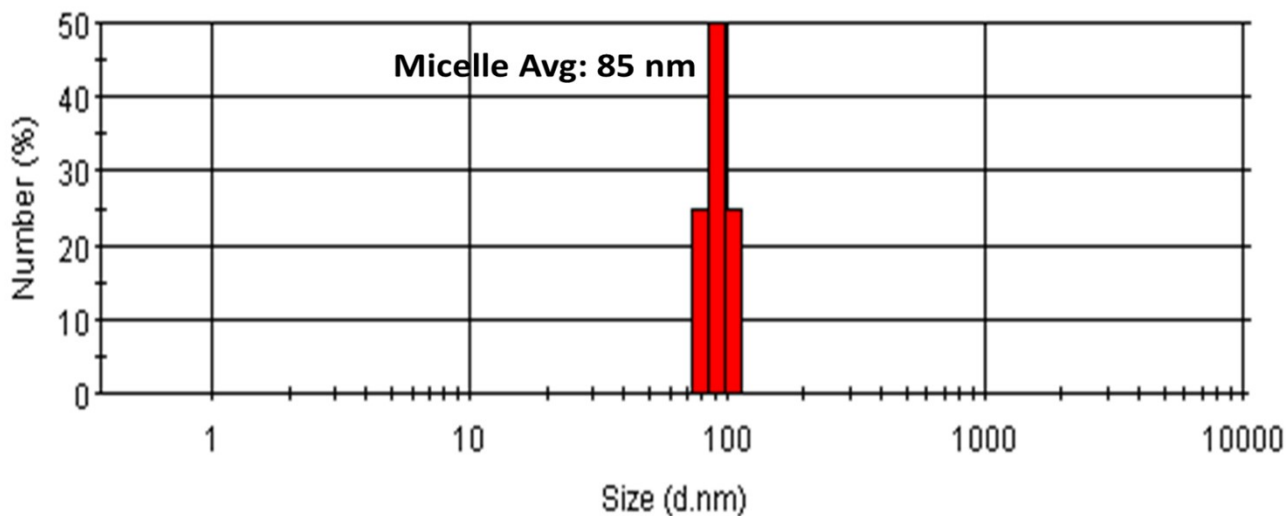

**Figure S2.** UV-visible absorption spectra, PL excitation (PLE) spectra, and PL spectra of two SiQD-De/F127 samples with different QD sizes.

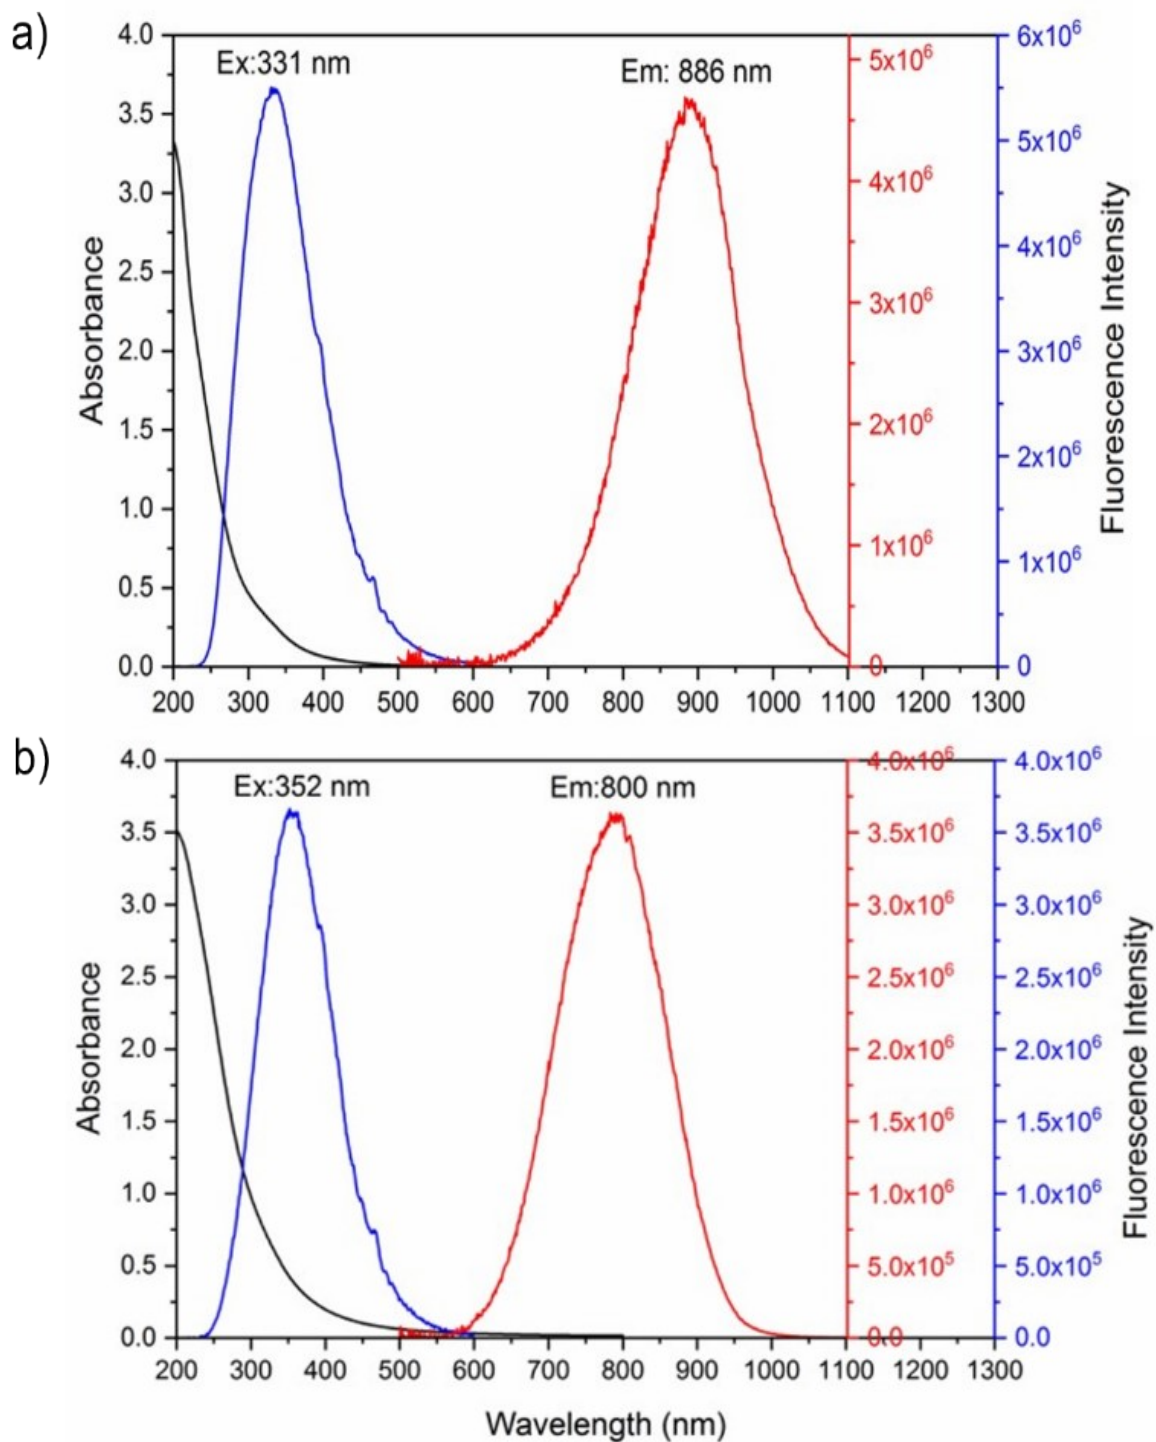

**Figure S3.** UV-visible absorption spectra, PL excitation (PLE) spectra, and PL spectra of two SiQD-De/F127 samples with different QD sizes. The diameters estimated from Scherrer broadening analysis are 4.8 nm, 4.0 nm. Both PLE spectra centered at 331, 352 nm, and their corresponding PL spectra centered at 886 and 800 nm spectrum are demonstrated for four SiQDs/F127 samples.



**Table S1.** The induced fit docking simulation produced 10 distinct binding poses. The gliding energy and docking score were used to determine the best positions.

|    | A     | B     | C        | D         | E               | F               | G            | H      | I         | J         | K         | L     | M         | N         | O     |
|----|-------|-------|----------|-----------|-----------------|-----------------|--------------|--------|-----------|-----------|-----------|-------|-----------|-----------|-------|
| 1  | Stars | Title | Entry ID | Entry Nam | Date Added      | Date Modified   | PDB TITLE    | PDB ID | PDB CLASS | PDB DEPO  | PDB forma | PDB R | PDB Rfree | PDB RESOI | PDB E |
| 2  |       | F127  | 1        | F127.1    | 1/23/2023 10:57 | 1/23/2023 10:57 | THE COMP6KA7 |        | IMMUNE    | 21-Jun-19 | 3.3       | 0.257 | 0.333     | 3         | X-RAY |
| 3  |       | F127  | 2        | F127.1    | 1/23/2023 10:57 | 1/23/2023 10:57 | THE COMP6KA7 |        | IMMUNE    | 21-Jun-19 | 3.3       | 0.257 | 0.333     | 3         | X-RAY |
| 4  |       | F127  | 3        | F127.1    | 1/23/2023 10:57 | 1/23/2023 10:57 | THE COMP6KA7 |        | IMMUNE    | 21-Jun-19 | 3.3       | 0.257 | 0.333     | 3         | X-RAY |
| 5  |       | F127  | 4        | F127.1    | 1/23/2023 10:57 | 1/23/2023 10:57 | THE COMP6KA7 |        | IMMUNE    | 21-Jun-19 | 3.3       | 0.257 | 0.333     | 3         | X-RAY |
| 6  |       | F127  | 5        | F127.1    | 1/23/2023 10:57 | 1/23/2023 10:57 | THE COMP6KA7 |        | IMMUNE    | 21-Jun-19 | 3.3       | 0.257 | 0.333     | 3         | X-RAY |
| 7  |       | F127  | 6        | F127.1    | 1/23/2023 10:57 | 1/23/2023 10:57 | THE COMP6KA7 |        | IMMUNE    | 21-Jun-19 | 3.3       | 0.257 | 0.333     | 3         | X-RAY |
| 8  |       | F127  | 7        | F127.1    | 1/23/2023 10:57 | 1/23/2023 10:57 | THE COMP6KA7 |        | IMMUNE    | 21-Jun-19 | 3.3       | 0.257 | 0.333     | 3         | X-RAY |
| 9  |       | F127  | 8        | F127.1    | 1/23/2023 10:57 | 1/23/2023 10:57 | THE COMP6KA7 |        | IMMUNE    | 21-Jun-19 | 3.3       | 0.257 | 0.333     | 3         | X-RAY |
| 10 |       | F127  | 9        | F127.1    | 1/23/2023 10:57 | 1/23/2023 10:57 | THE COMP6KA7 |        | IMMUNE    | 21-Jun-19 | 3.3       | 0.257 | 0.333     | 3         | X-RAY |
| 11 |       | F127  | 10       | F127.1    | 1/23/2023 10:57 | 1/23/2023 10:57 | THE COMP6KA7 |        | IMMUNE    | 21-Jun-19 | 3.3       | 0.257 | 0.333     | 3         | X-RAY |
| 12 |       |       |          |           |                 |                 |              |        |           |           |           |       |           |           |       |

|    | O          | P              | Q        | R          | S          | T           | U           | V        | W           | X        | Y       | Z           | AA         | AB          | AC        | AD        | AE         | AF         |
|----|------------|----------------|----------|------------|------------|-------------|-------------|----------|-------------|----------|---------|-------------|------------|-------------|-----------|-----------|------------|------------|
| 1  | PDB EXPD   | PDB EXPD       | PDB REMA | PDB REMA   | Source Pat | Source File | Source File | entry id | ba prepared | assigned | b added | hyd treated | mx created | dis deleted | far model | nun Prime | Coul Prime | Cov: Prime |
| 2  | X-RAY DIFF | 93 A, B, C, D, | 1.000000 | C:\Users\9 | InducedFit | 1           | 4           | TRUE     | TRUE        | TRUE     | TRUE    | TRUE        | TRUE       | TRUE        | 0         | -26174.6  | 4212.04    | -4270.51   |
| 3  | X-RAY DIFF | 93 A, B, C, D, | 1.000000 | C:\Users\9 | InducedFit | 2           | 4           | TRUE     | TRUE        | TRUE     | TRUE    | TRUE        | TRUE       | TRUE        | 0         | -26167.2  | 4206.8     | -4276.07   |
| 4  | X-RAY DIFF | 93 A, B, C, D, | 1.000000 | C:\Users\9 | InducedFit | 3           | 4           | TRUE     | TRUE        | TRUE     | TRUE    | TRUE        | TRUE       | TRUE        | 0         | -26162.3  | 4207.25    | -4269.24   |
| 5  | X-RAY DIFF | 93 A, B, C, D, | 1.000000 | C:\Users\9 | InducedFit | 4           | 4           | TRUE     | TRUE        | TRUE     | TRUE    | TRUE        | TRUE       | TRUE        | 0         | -26154.7  | 4205.93    | -4270.67   |
| 6  | X-RAY DIFF | 93 A, B, C, D, | 1.000000 | C:\Users\9 | InducedFit | 5           | 4           | TRUE     | TRUE        | TRUE     | TRUE    | TRUE        | TRUE       | TRUE        | 0         | -26157.5  | 4206.19    | -4274.9    |
| 7  | X-RAY DIFF | 93 A, B, C, D, | 1.000000 | C:\Users\9 | InducedFit | 6           | 4           | TRUE     | TRUE        | TRUE     | TRUE    | TRUE        | TRUE       | TRUE        | 0         | -26162.5  | 4208.34    | -4274.63   |
| 8  | X-RAY DIFF | 93 A, B, C, D, | 1.000000 | C:\Users\9 | InducedFit | 7           | 4           | TRUE     | TRUE        | TRUE     | TRUE    | TRUE        | TRUE       | TRUE        | 0         | -26168.6  | 4213.64    | -4278.5    |
| 9  | X-RAY DIFF | 93 A, B, C, D, | 1.000000 | C:\Users\9 | InducedFit | 8           | 4           | TRUE     | TRUE        | TRUE     | TRUE    | TRUE        | TRUE       | TRUE        | 0         | -26152.4  | 4206.19    | -4268.35   |
| 10 | X-RAY DIFF | 93 A, B, C, D, | 1.000000 | C:\Users\9 | InducedFit | 9           | 4           | TRUE     | TRUE        | TRUE     | TRUE    | TRUE        | TRUE       | TRUE        | 0         | -26160.8  | 4211.15    | -4272.08   |
| 11 | X-RAY DIFF | 93 A, B, C, D, | 1.000000 | C:\Users\9 | InducedFit | 10          | 4           | TRUE     | TRUE        | TRUE     | TRUE    | TRUE        | TRUE       | TRUE        | 0         | -26161.4  | 4206.51    | -4270.24   |
| 12 |            |                |          |            |            |             |             |          |             |          |         |             |            |             |           |           |            |            |

|    | AG         | AH         | AI         | AJ        | AK         | AL         | AM         | AN        | AO         | AP        | AQ         | AR        | AS         | AT         | AU        | AV          | AW       | AX          |
|----|------------|------------|------------|-----------|------------|------------|------------|-----------|------------|-----------|------------|-----------|------------|------------|-----------|-------------|----------|-------------|
| 1  | Prime Solv | Prime Lipo | Prime Ener | Prime Hbo | Prime Pack | Prime Self | ran protas | Potential | ERMS Deriv | Max Deriv | Stretch En | Bend Ener | LI-14 Ener | El-14 Ener | Van der W | Electrostat | Dihedral | Erran imprf |
| 2  | -4521.26   | -4745.06   | -36428.5   | -304.493  | -24.449    | -600.213   | TRUE       | 7.906     | 0          | 0         | 0.175      | 0.996     | 1.981      | 38.747     | -1.188    | -33.798     | 0.992    | TRUE        |
| 3  | -4530.07   | -4743.68   | -36438.6   | -303.735  | -24.449    | -600.222   | TRUE       | 7.906     | 0          | 0         | 0.175      | 0.996     | 1.981      | 38.747     | -1.188    | -33.798     | 0.992    | TRUE        |
| 4  | -4532.33   | -4748.42   | -36432.8   | -303.029  | -24.449    | -600.337   | TRUE       | 7.906     | 0          | 0         | 0.175      | 0.996     | 1.981      | 38.747     | -1.188    | -33.798     | 0.992    | TRUE        |
| 5  | -4536.86   | -4746.45   | -36430.3   | -302.939  | -24.449    | -600.146   | TRUE       | 7.906     | 0          | 0         | 0.175      | 0.996     | 1.981      | 38.747     | -1.188    | -33.798     | 0.992    | TRUE        |
| 6  | -4527.38   | -4748      | -36429.8   | -303.499  | -24.449    | -600.265   | TRUE       | 7.906     | 0          | 0         | 0.175      | 0.996     | 1.981      | 38.747     | -1.188    | -33.798     | 0.992    | TRUE        |
| 7  | -4525.2    | -4745.54   | -36427.4   | -303.129  | -24.449    | -600.358   | TRUE       | 7.906     | 0          | 0         | 0.175      | 0.996     | 1.981      | 38.747     | -1.188    | -33.798     | 0.992    | TRUE        |
| 8  | -4519.84   | -4746.76   | -36429.5   | -304.662  | -24.449    | -600.293   | TRUE       | 7.906     | 0          | 0         | 0.175      | 0.996     | 1.981      | 38.747     | -1.188    | -33.798     | 0.992    | TRUE        |
| 9  | -4534.44   | -4743.32   | -36420     | -302.873  | -24.449    | -600.378   | TRUE       | 7.906     | 0          | 0         | 0.175      | 0.996     | 1.981      | 38.747     | -1.188    | -33.798     | 0.992    | TRUE        |
| 10 | -4526.11   | -4740.87   | -36417.1   | -303.618  | -24.449    | -600.323   | TRUE       | 7.906     | 0          | 0         | 0.175      | 0.996     | 1.981      | 38.747     | -1.188    | -33.798     | 0.992    | TRUE        |
| 11 | -4522.95   | -4742.84   | -36420     | -304.326  | -24.449    | -600.292   | TRUE       | 7.906     | 0          | 0         | 0.175      | 0.996     | 1.981      | 38.747     | -1.188    | -33.798     | 0.992    | TRUE        |
| 12 |            |            |            |           |            |            |            |           |            |           |            |           |            |            |           |             |          |             |

|    | AY          | AZ         | BA         | BB         | BC         | BD         | BE         | BF          | BG          | BH          | BI       | BJ           | BK          | BL         | BM           | BN           | BO           | BP           |
|----|-------------|------------|------------|------------|------------|------------|------------|-------------|-------------|-------------|----------|--------------|-------------|------------|--------------|--------------|--------------|--------------|
| 1  | grid versio | gridbox xc | gridbox yc | gridbox zc | gridbox xr | gridbox yr | gridbox zr | gridbox lig | gridbox lig | gridbox lig | receptor | glide gridfi | glide lignu | docking sc | glide liganc | glide liganc | glide liganc | glide gscore |
| 2  | 66013       | 15.417     | 29.159     | 42.816     | 21.766     | 21.766     | 21.766     | 10          | 10          | 10          | TRUE     | InducedFit   | 1           | 1.513      | 0.138        | 0.306        | 0.445        | 1.513        |
| 3  | 66013       | 15.389     | 30.127     | 40.406     | 21.311     | 21.311     | 21.311     | 10          | 10          | 10          | TRUE     | InducedFit   | 1           | 2.071      | 0.188        | 0.419        | 0.61         | 2.071        |
| 4  | 66013       | 16.448     | 28.055     | 44.112     | 21.818     | 21.818     | 21.818     | 10          | 10          | 10          | TRUE     | InducedFit   | 1           | 1.884      | 0.171        | 0.381        | 0.554        | 1.884        |
| 5  | 66013       | 15.06      | 28.828     | 43.04      | 22.049     | 22.049     | 22.049     | 10          | 10          | 10          | TRUE     | InducedFit   | 1           | 1.759      | 0.16         | 0.356        | 0.518        | 1.759        |
| 6  | 66013       | 16.395     | 28.778     | 41.041     | 21.561     | 21.561     | 21.561     | 10          | 10          | 10          | TRUE     | InducedFit   | 1           | 1.879      | 0.171        | 0.38         | 0.553        | 1.879        |
| 7  | 66013       | 16.857     | 29.056     | 42.037     | 21.863     | 21.863     | 21.863     | 10          | 10          | 10          | TRUE     | InducedFit   | 1           | 2.145      | 0.195        | 0.434        | 0.631        | 2.145        |
| 8  | 66013       | 15.317     | 28.884     | 41.205     | 22.583     | 22.583     | 22.583     | 10          | 10          | 10          | TRUE     | InducedFit   | 1           | 2.525      | 0.23         | 0.51         | 0.743        | 2.525        |
| 9  | 66013       | 15.577     | 28.806     | 42.999     | 22.096     | 22.096     | 22.096     | 10          | 10          | 10          | TRUE     | InducedFit   | 1           | 2.204      | 0.2          | 0.446        | 0.649        | 2.204        |
| 10 | 66013       | 16.533     | 29.441     | 43.112     | 20.704     | 20.704     | 20.704     | 10          | 10          | 10          | TRUE     | InducedFit   | 1           | 2.457      | 0.223        | 0.497        | 0.723        | 2.457        |
| 11 | 66013       | 15.392     | 29.382     | 43.868     | 21.78      | 21.78      | 21.78      | 10          | 10          | 10          | TRUE     | InducedFit   | 1           | 2.659      | 0.242        | 0.538        | 0.783        | 2.659        |
| 12 |             |            |            |            |            |            |            |             |             |             |          |              |             |            |              |              |              |              |

|    | BQ         | BR         | BS         | BT         | BU         | BV         | BW         | BX          | BY         | BZ         | CA          | CB          | CC          | CD        | CE         | CF        | CG        | CH        |
|----|------------|------------|------------|------------|------------|------------|------------|-------------|------------|------------|-------------|-------------|-------------|-----------|------------|-----------|-----------|-----------|
| 1  | glide lipo | glide hbon | glide meta | glide rewa | glide evdw | glide ecol | glide erot | glide esite | glide emoc | glide ener | glide einte | glide confr | glide poser | glide eff | target tem | PDB CRYST | PDB CRYST | PDB CRYST |
| 2  | -0.699     | -0.911     | 0          | -2.25      | -12.539    | -12.713    | 7.907      | 0           | -20.604    | -25.252    | 4.02        | 181         | 278         | 0         | 298        | 59.926    | 107.42    | 171.35    |
| 3  | -0.952     | -0.29      | 0          | -2.25      | -14.226    | -10.879    | 7.907      | 0           | -18.808    | -25.105    | 5.876       | 89          | 332         | 0         | 298        | 59.926    | 107.42    | 171.35    |
| 4  | -1.33      | -0.608     | 0          | -2.25      | -16.871    | -6.608     | 7.907      | 0           | -18.117    | -23.479    | 5.309       | 68          | 310         | 0         | 298        | 59.926    | 107.42    | 171.35    |
| 5  | -0.585     | -0.585     | 0          | -2.25      | -8.438     | -15.366    | 7.907      | 0           | -19.064    | -23.804    | 4.018       | 147         | 374         | 0         | 298        | 59.926    | 107.42    | 171.35    |
| 6  | -0.806     | -0.546     | 0          | -2.25      | -14.382    | -11.371    | 7.907      | 0           | -20.342    | -25.753    | 4.897       | 51          | 283         | 0         | 298        | 59.926    | 107.42    | 171.35    |
| 7  | -1.033     | -0.575     | 0          | -2.25      | -15.091    | -7.657     | 7.907      | 0           | -18.817    | -22.748    | 0.495       | 60          | 185         | 0         | 298        | 59.926    | 107.42    | 171.35    |
| 8  | -0.858     | 0          | 0          | -2.25      | -15.895    | -9.862     | 7.907      | 0           | -18.203    | -25.757    | 6.573       | 206         | 15          | 0         | 298        | 59.926    | 107.42    | 171.35    |
| 9  | -1.045     | -0.168     | 0          | -2.25      | -16.967    | -9.27      | 7.907      | 0           | -19.283    | -26.237    | 6.971       | 109         | 145         | 0         | 298        | 59.926    | 107.42    | 171.35    |
| 10 | -0.659     | -0.553     | 0          | -2.25      | -13.967    | -8.589     | 7.907      | 0           | -16.691    | -22.556    | 2.863       | 82          | 252         | 0         | 298        | 59.926    | 107.42    | 171.35    |
| 11 | -0.332     | -0.681     | 0          | -2.25      | -12.944    | -8.912     | 7.907      | 0           | -15.06     | -21.856    | 4.697       | 105         | 171         | 0         | 298        | 59.926    | 107.42    | 171.35    |
| 12 |            |            |            |            |            |            |            |             |            |            |             |             |             |           |            |           |           |           |

| CI        | CJ        | CK        | CL           | CM        | CN  |          |
|-----------|-----------|-----------|--------------|-----------|-----|----------|
| PDB CRYST | PDB CRYST | PDB CRYST | PDB CRYST    | PDB CRYST | IFD | Score    |
| 90        | 90        | 90        | 8 P 21 21 21 |           |     | -1819.91 |
| 90        | 90        | 90        | 8 P 21 21 21 |           |     | -1819.86 |
| 90        | 90        | 90        | 8 P 21 21 21 |           |     | -1819.76 |
| 90        | 90        | 90        | 8 P 21 21 21 |           |     | -1819.76 |
| 90        | 90        | 90        | 8 P 21 21 21 |           |     | -1819.61 |
| 90        | 90        | 90        | 8 P 21 21 21 |           |     | -1819.23 |
| 90        | 90        | 90        | 8 P 21 21 21 |           |     | -1818.95 |
| 90        | 90        | 90        | 8 P 21 21 21 |           |     | -1818.8  |
| 90        | 90        | 90        | 8 P 21 21 21 |           |     | -1818.4  |
| 90        | 90        | 90        | 8 P 21 21 21 |           |     | -1818.34 |
